# Supplementary material
Source: PubMed Central journal article supplement (PMC11029694)
Supplement: 262_2011_1184_MOESM1_ESM.pdf [file 262_2011_1184_MOESM1_ESM.pdf]

## Online resource 1

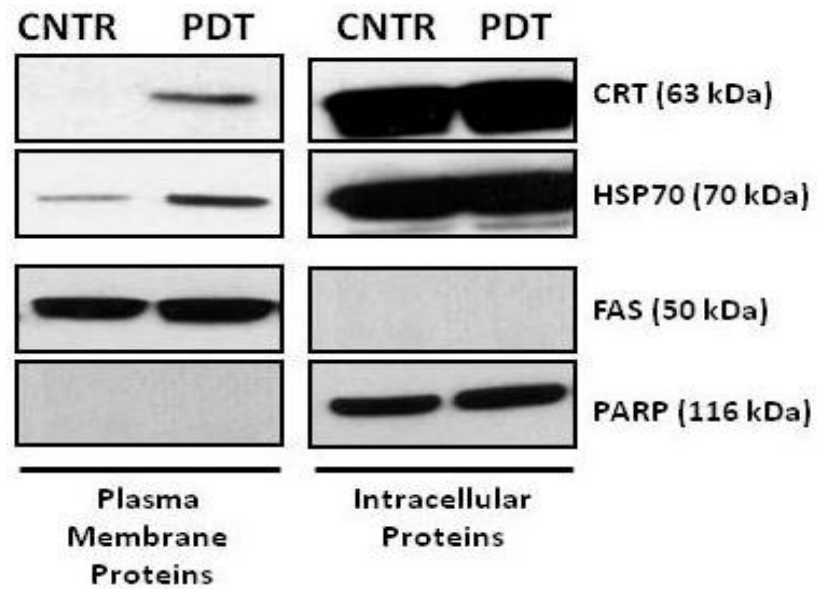

**Hypericin-PDT treated cancer cells surface expose HSP70 and calreticulin as early as 30 mins after treatment.** T24 cells were treated with high PDT dose followed by surface protein biotinylation at 30 min post-PDT and immunoblotting. CNTR denotes untreated samples.

## Online resource 2

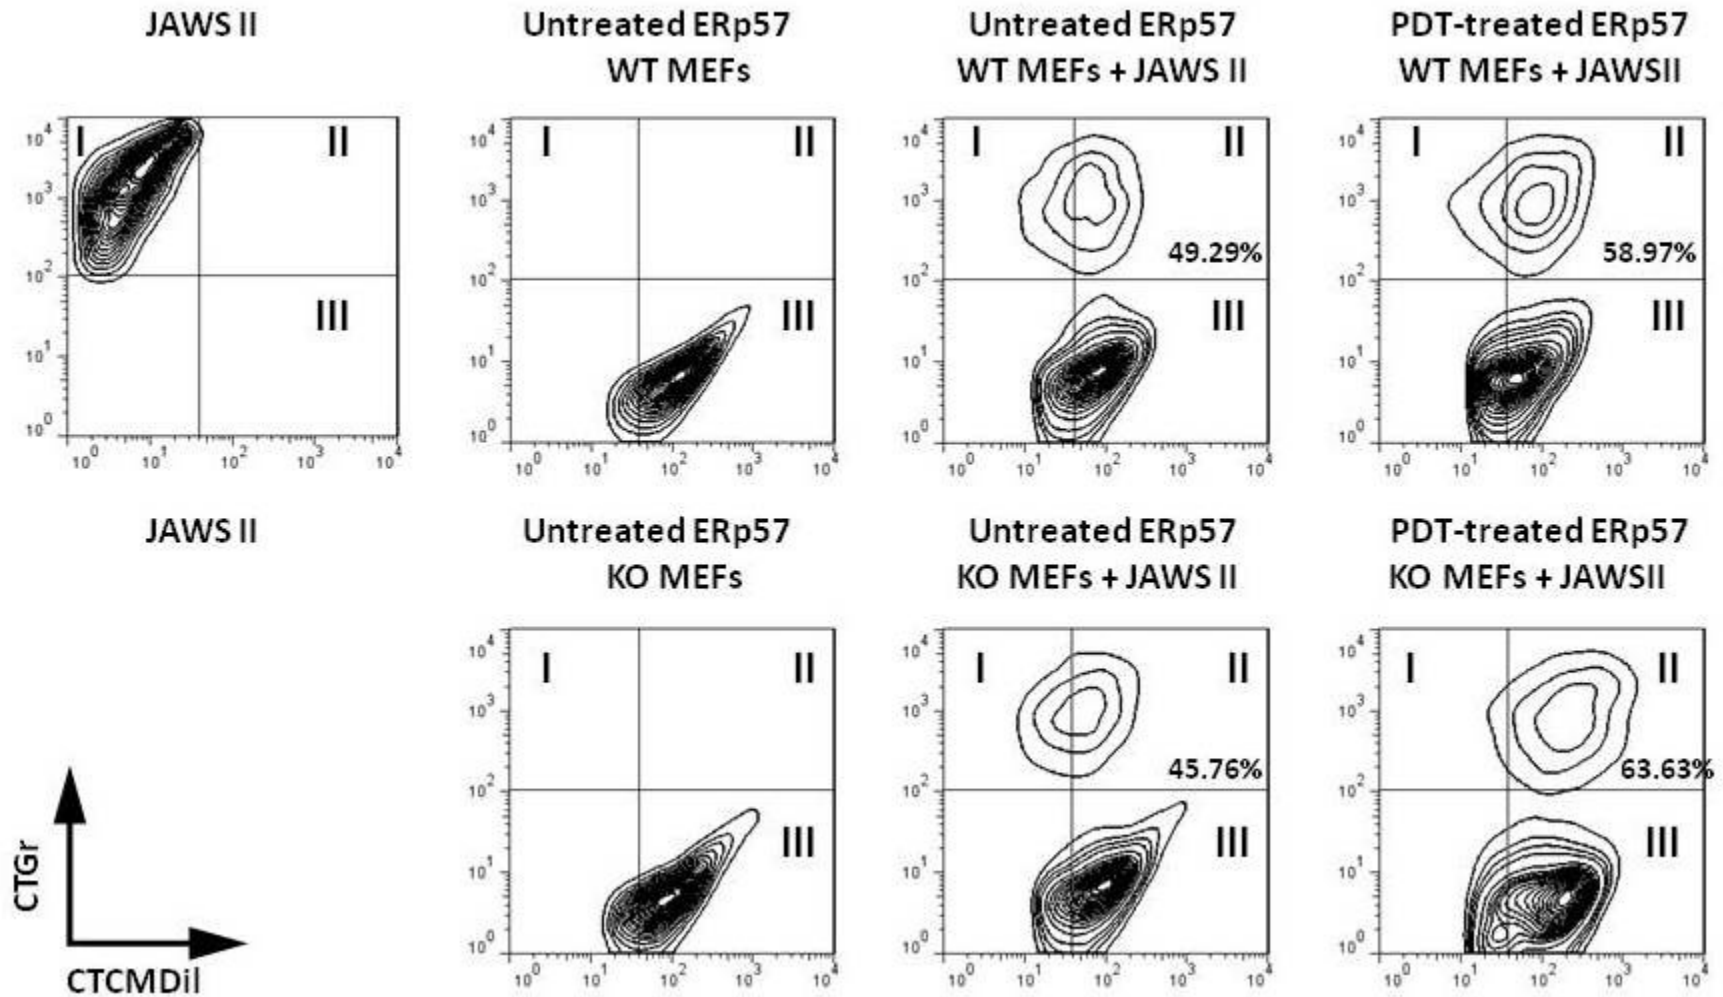

**Absence of ERp57 does not reduce phagocytosis after Hypericin-PDT treatment.** MEF cells containing ERp57 (WT) or lacking it (KO) were treated with a medium PDT dose or left untreated. They were then labelled with Cell Tracker CM-Dil (CTCMDil) and recovered 1 h post-PDT followed by detection of phagocytosis by Cell Tracker Green (CTGr)-labelled JAWSII DCs. JAWSII cells accumulated in quadrant I (no phagocytosis) and quadrant II (phagocytic uptake) while free MEF cells accumulated in quadrant III. Calculated % phagocytosis is mentioned for the respective pictograms. Results are representative of triplicate determinations.
